# Supplementary material
Source: PubMed Central journal article supplement (PMC5947860)
Supplement: NIHMS961759-supplement-1.pdf [file NIHMS961759-supplement-1.pdf]

## SUPPLEMENTAL FIGURE LEGENDS

Figure S1

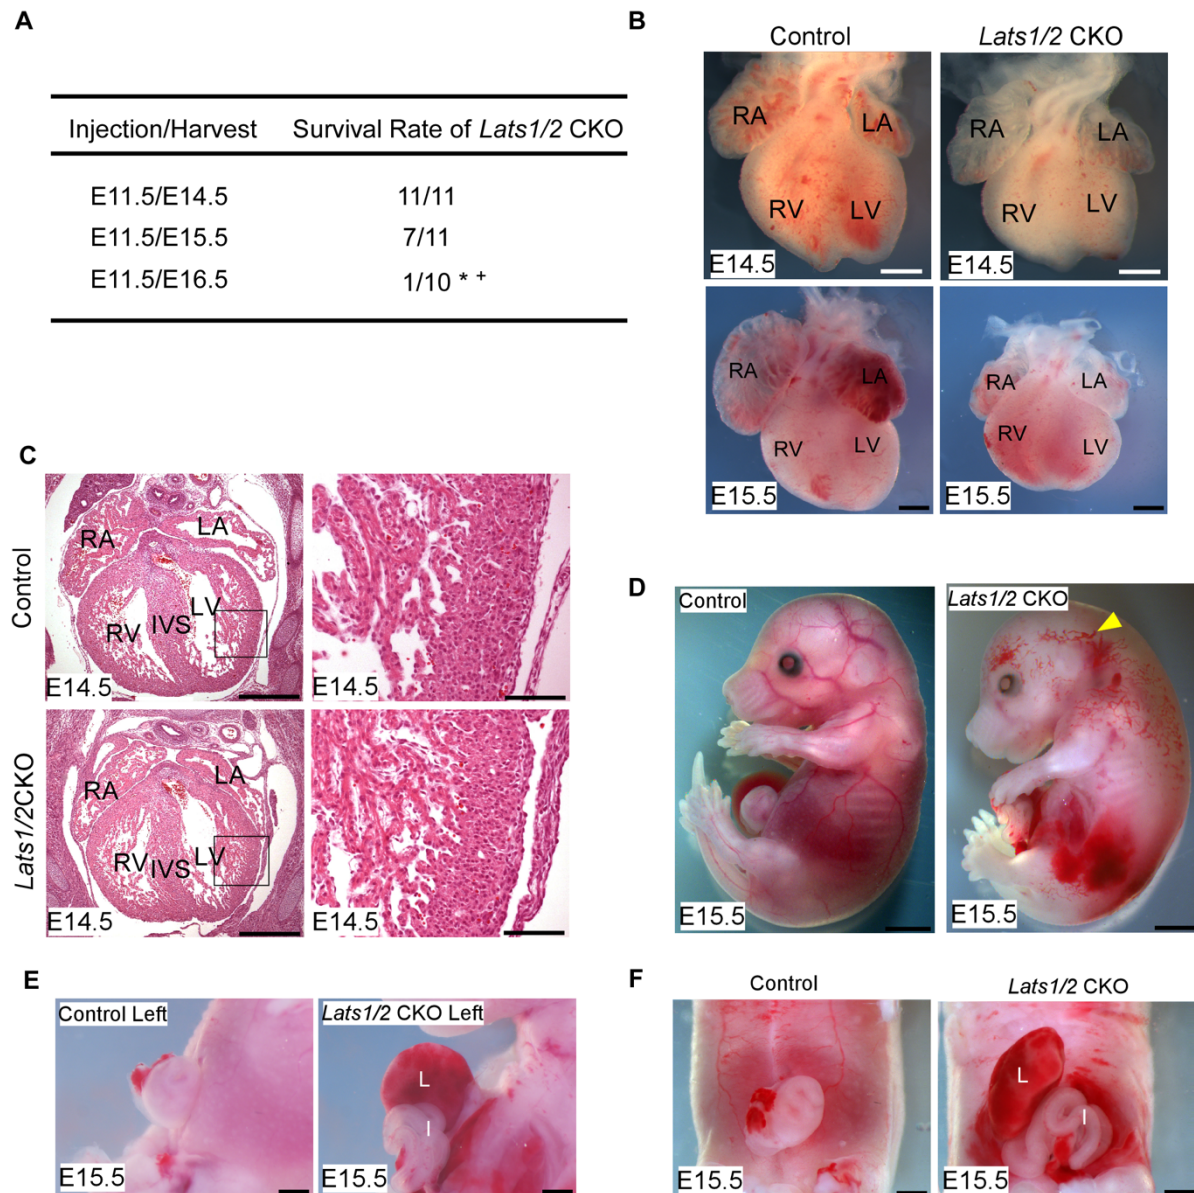

**Figure S1. Related to Figure 1. Knocking out *Lats1/2* leads to embryonic lethality at E15.5.**

(A) Cre activity was induced at E11.5 by tamoxifen injection. *Lats1/2* CKO survival rate was at different harvest time series. \* $P < 0.001$  between E16.5 and E14.5, Fisher's exact

test.  $^*P < 0.05$  between E16.5 and E15.5, Fisher's exact test. (B-C) Gross heart morphology and H&E stained sections from at E14.5 and E15.5. (D-F) Non-cardiac defects in *Lats1/2* CKO at E15.5, including hemorrhage (yellow arrowheads) and herniated liver (L) and intestine (I). Scale bar: B 400 $\mu$ m; C left panel 500  $\mu$ m; right panel 100  $\mu$ m; D 2000 $\mu$ m; E-F 1000 $\mu$ m.

**Figure S2**

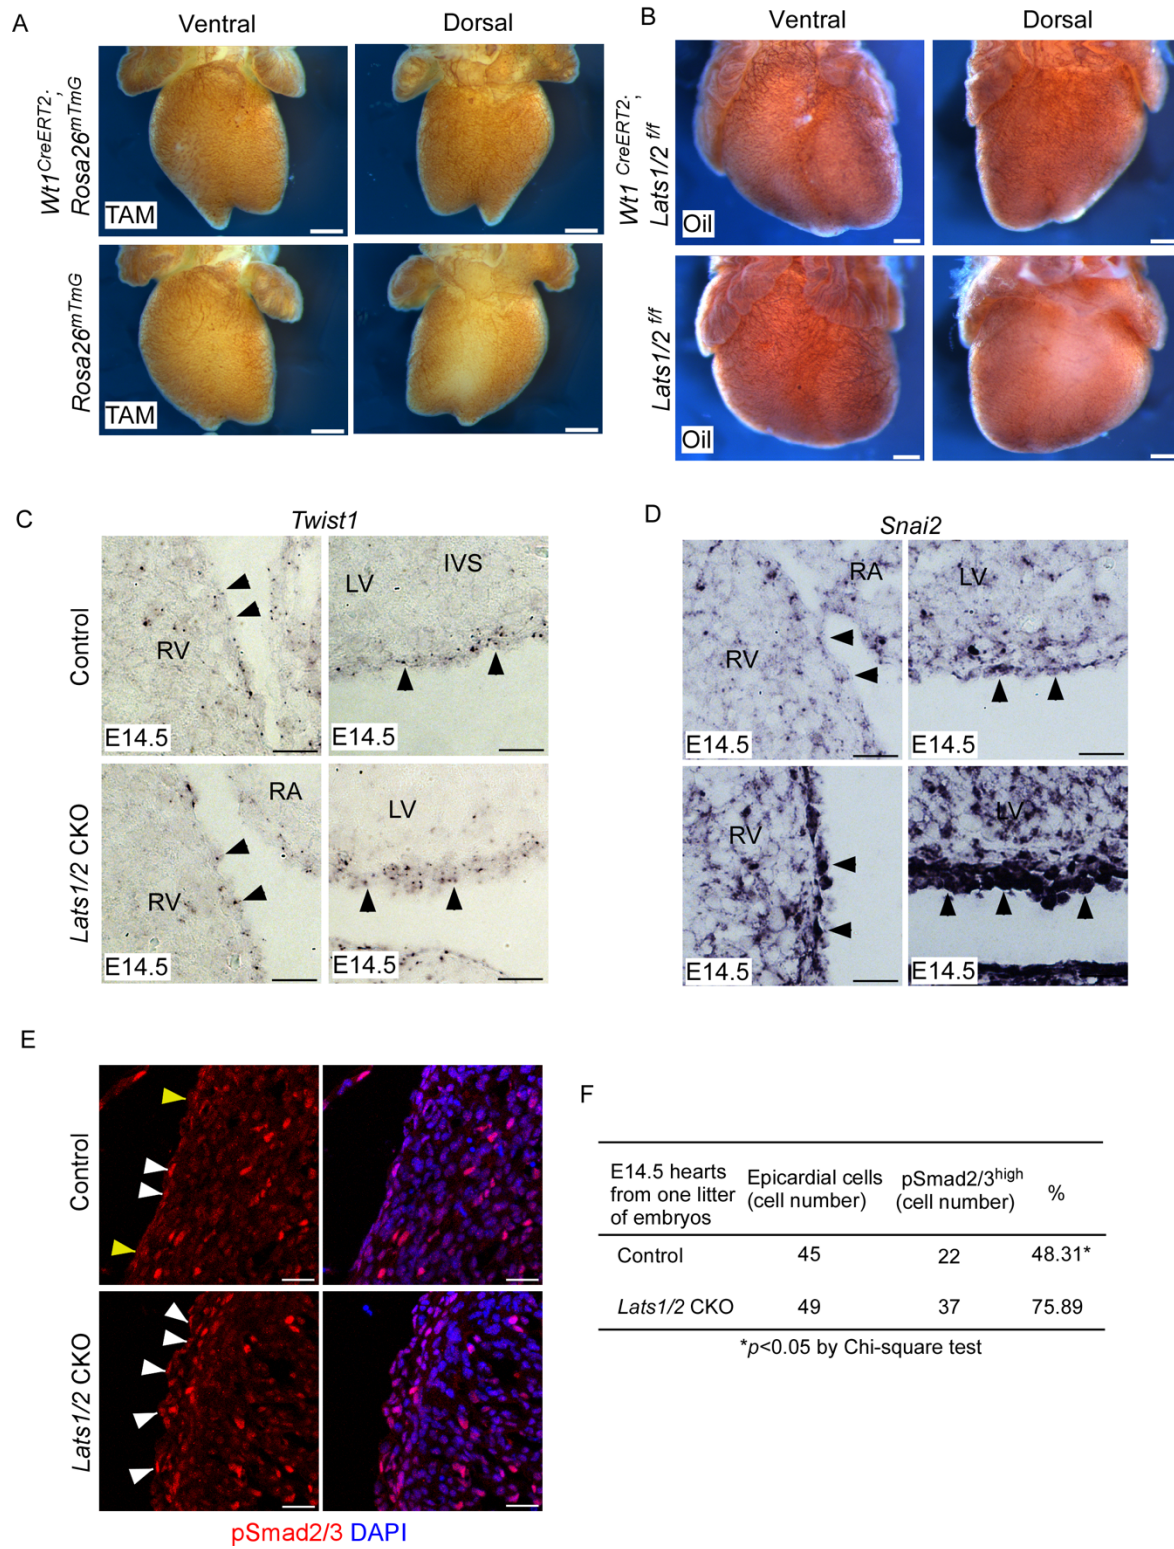

**Figure S2. Related to Figure 1. Control experiments to validate coronary vessel development defects in *Lats1/2* CKO and EMT factors expression in epicardium and EPDC.**

(A) *Wt1*<sup>CreERT2/+</sup>; *Rosa26*<sup>mTmG</sup> injected with Tamoxifen (TAM) exhibited well-formed coronary vasculature compared with *Rosa26*<sup>mTmG</sup> littermate at E14.5. (B) *Wt1*<sup>CreERT2/+</sup>; *Lats1/2*<sup>ff</sup> hearts exhibited organized coronary vessel injected with vehicle control peanut oil compared with *Lats1/2*<sup>ff</sup> littermate at E15.0. (C-D) EMT factors *Twist1* and *Snai2* detected by *in situ* probe at E14.5. (E) pSmad2/3 activity in epicardium. White arrowheads point to pSmad2/3 high-expressing epicardial cells (pSmad2/3<sup>high</sup>) and yellow arrowheads point to pSmad2/3 low-expressing epicardial cells. *Lats1/2* CKO hearts exhibited more pSmad2/3<sup>high</sup> epicardial cells. (F) Quantification of pSmad2/3<sup>high</sup> epicardial cells. Scale bar: A-B, 400  $\mu$ m, C-E, 25  $\mu$ m.

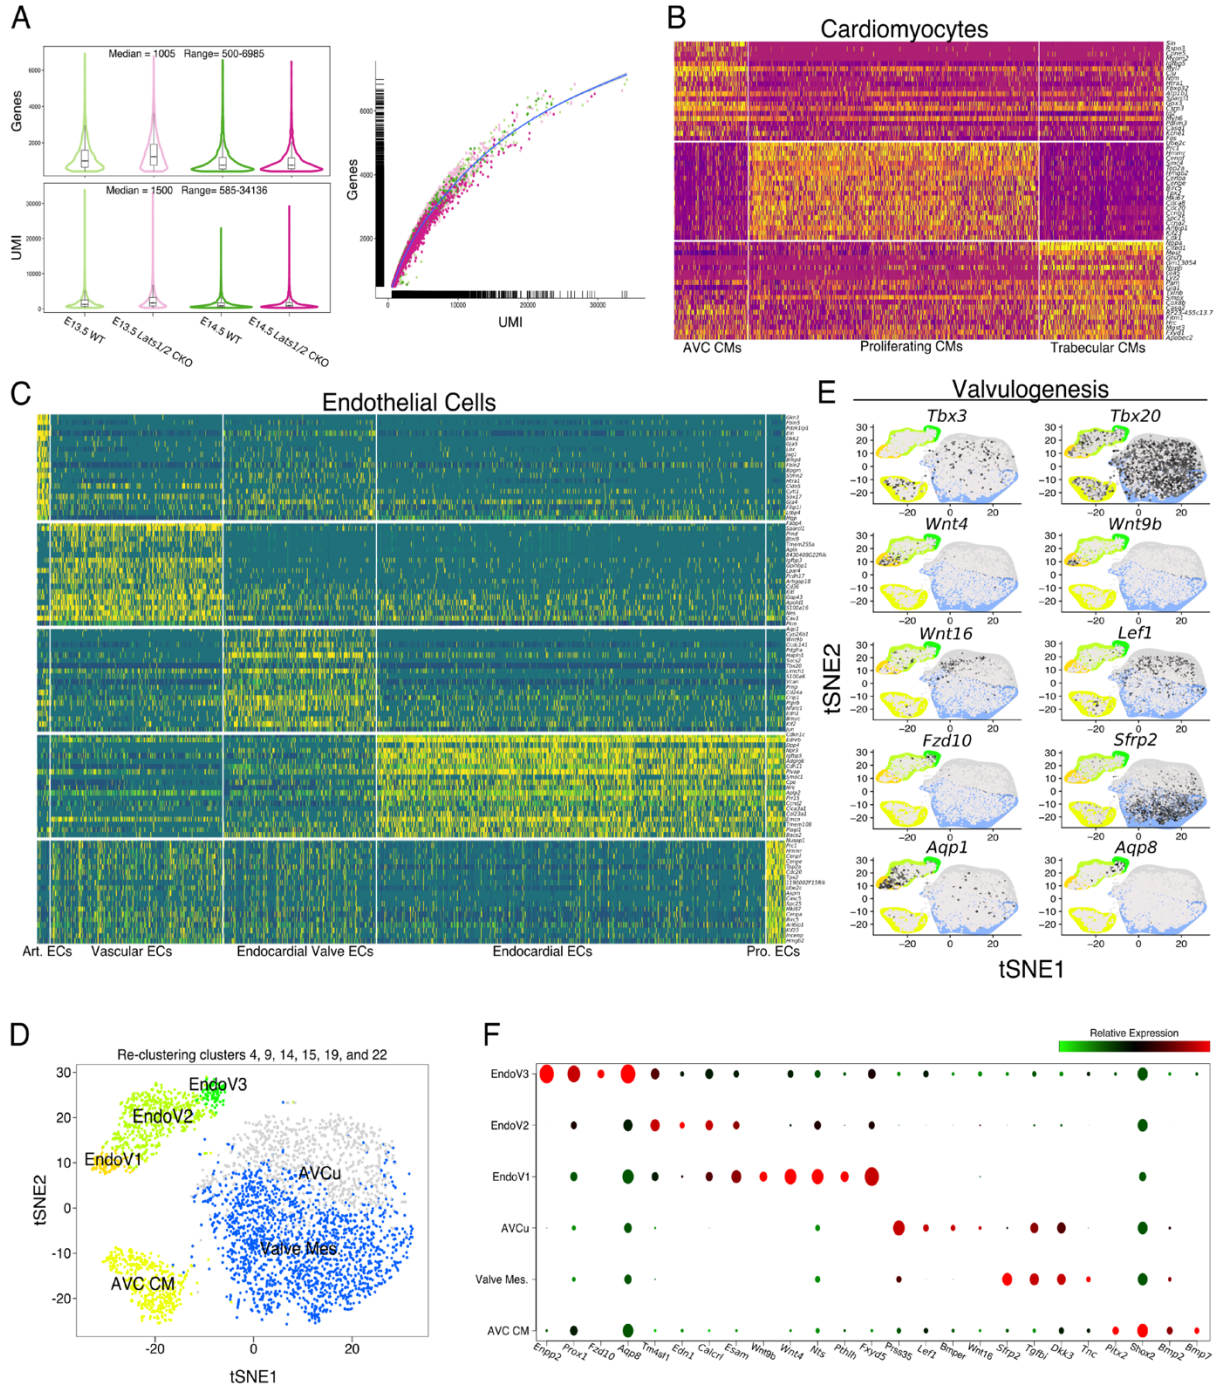

**Figure S3. Related to Figure 2 and 3. Drop-seq library quality control, cardiomyocyte sub-population expression, endothelial cell markers, and valvulogenesis signatures.** (A) Quality control metrics for individual Drop-seq experiments. (Left) Violin plots displaying the number of genes and Unique Molecular Identifiers (UMI) per individual cell with total statistics listed at top (combined data set). (Right) Number of genes and UMI per cell plotted against each other. Plots and points all colored according to Fig. 2A. (B) Heatmap of top differentially expressed genes among rare CM cell populations. Highly expressed genes are shown as yellow/orange. (C) Heatmap displaying the top differentially expressed genes across all endothelial-like cells. Highly expressed genes are yellow. (D) Clustering and tSNE visualization of 4,183 cells implicated in valvulogenesis. (E) Feature expression plots of the classic, as well as some novel genes expressed during valvulogenesis. Gene expression is indicated by dark black, and the background color indicates the cluster/cellular identity shown in D. (F) Single-cell markers of cardiac valve development. The relative expression levels of each gene (column) are shown as dots for each of the 6 cardiac valve clusters identified in D. The size of the dot indicates the number of cells expressing the gene per cluster, and the color denotes expression levels with bright red representing the highest level of gene expression.

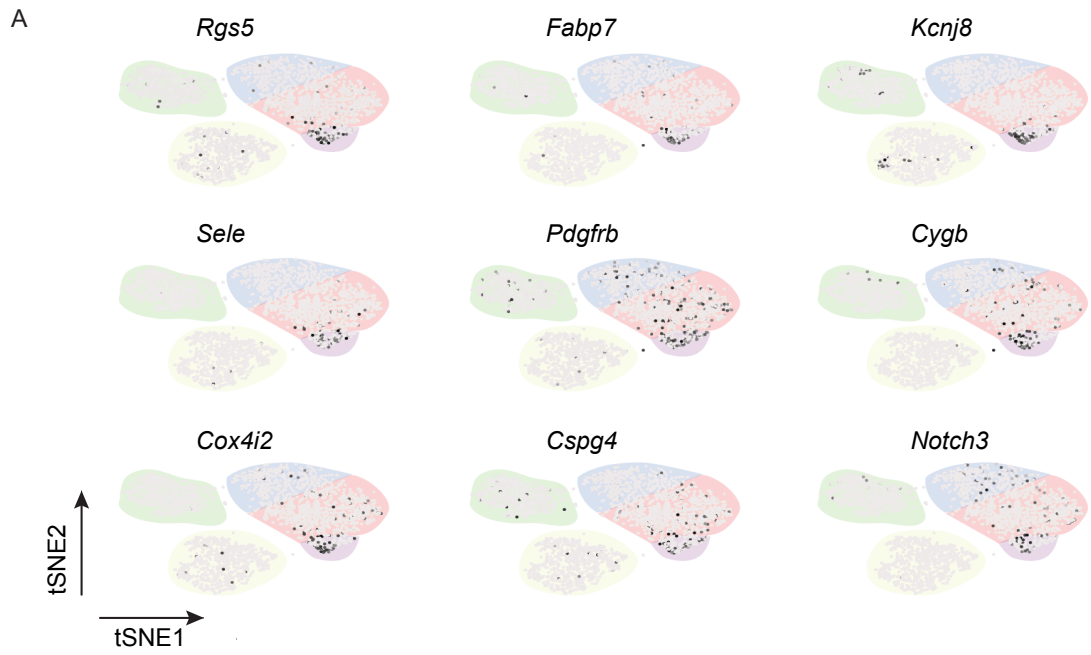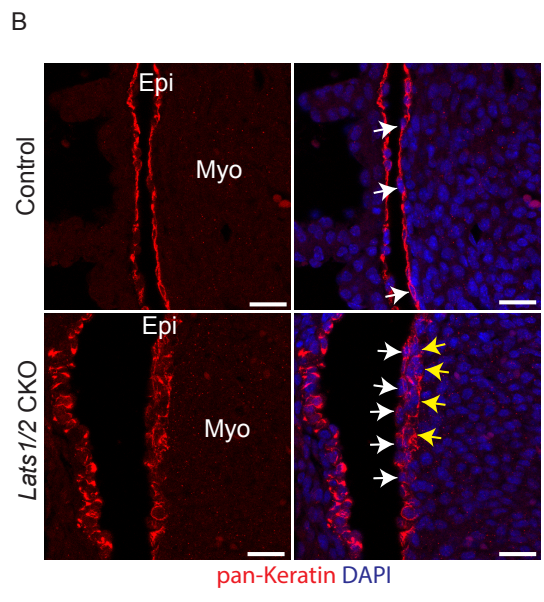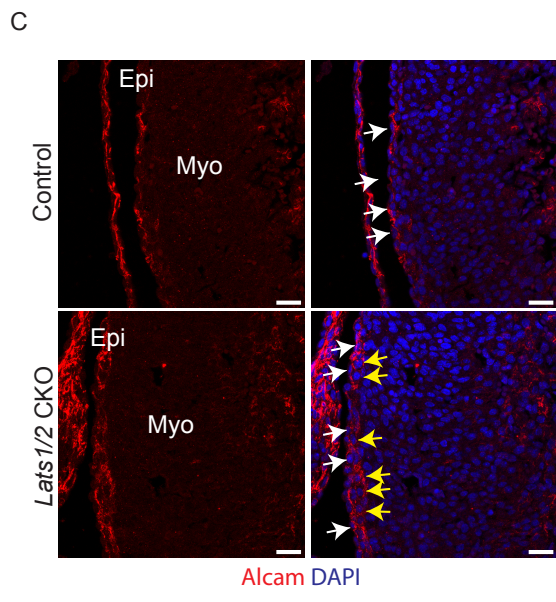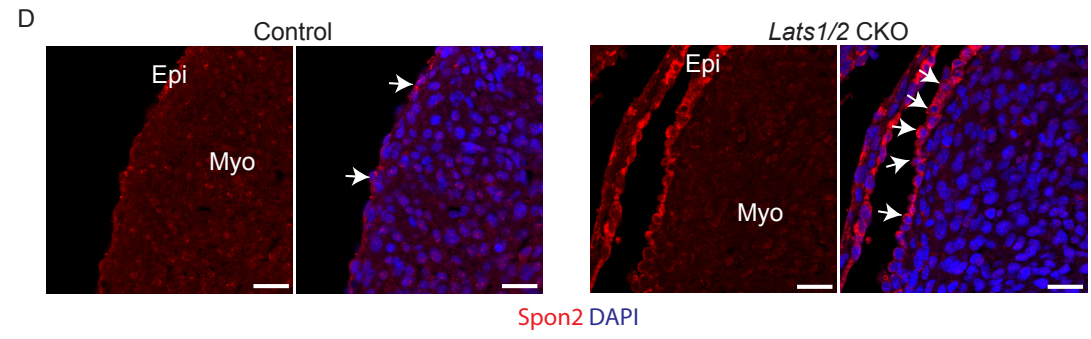

**Figure S4. Related to Figure 3 and Figure 4. Gene expression of FB2 and validation of epicardial/subepicardial cell identity.** (A) Cluster FB2 feature plot of gene expression projected across the tSNE. Black indicates high gene expression, and cluster identities and boundaries are set in the background and colored according to Figure 3B. (B-C) In addition to epicardium stained with pan-Keratin and Alcam in both control and *Lats1/2* CKO hearts (white arrows), subepicardium of *Lats1/2* CKO hearts exhibited ectopic expression of pan-Keratin and Alcam (yellow arrows). (D) Increased *Spon2* expression in *Lats1/2* CKO epicardium compared with wild type.

**Figure S5**

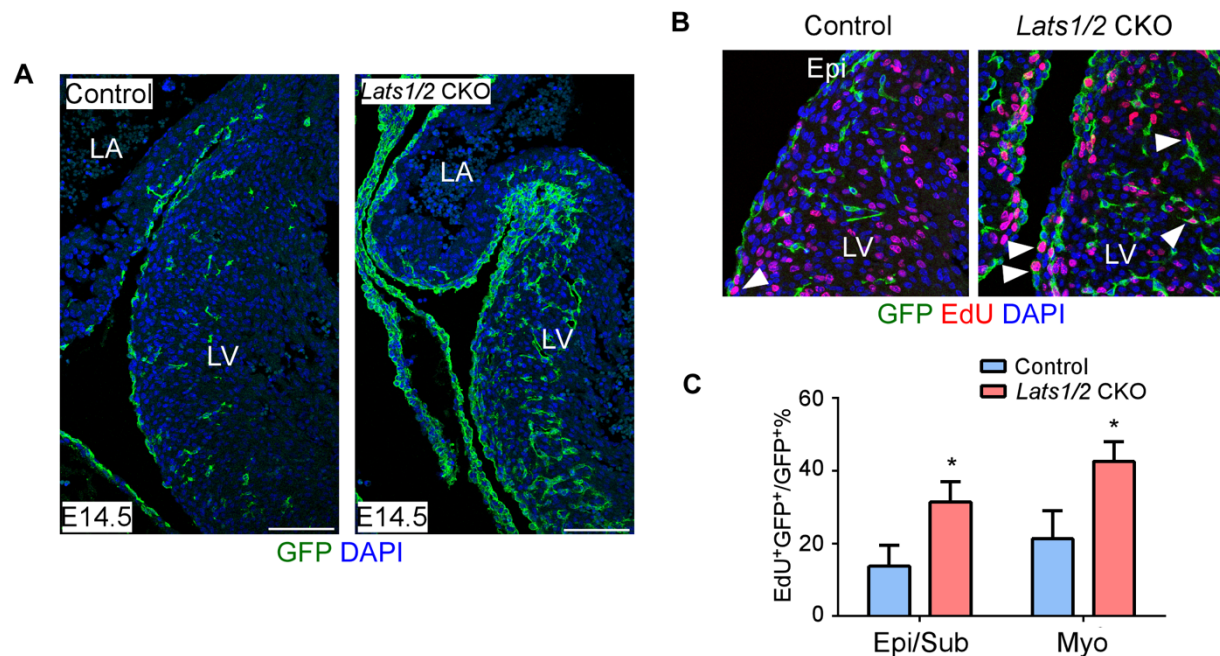

**Figure S5. Related to Figure 5. Increased epicardium and EPDC proliferation in *Lats1/2* CKO hearts**

(A) The *Wt1* lineage was traced by GFP expression, which includes epicardium and EPDC. An increased number of epicardium and EPDCs were observed in *Lats1/2* CKO hearts. (B-C) *Lats1/2* CKO exhibited significantly increased EdU labelling in GFP



positive cells. Proliferating epicardial cells and EPDC were indicated as GFP<sup>+</sup> EdU<sup>+</sup> double positive cells(arrowheads). \**P*<0.05, Mann-Whitney U test. Data shown are means ± SD. Scale bar: 50μm.

**Figure S6**

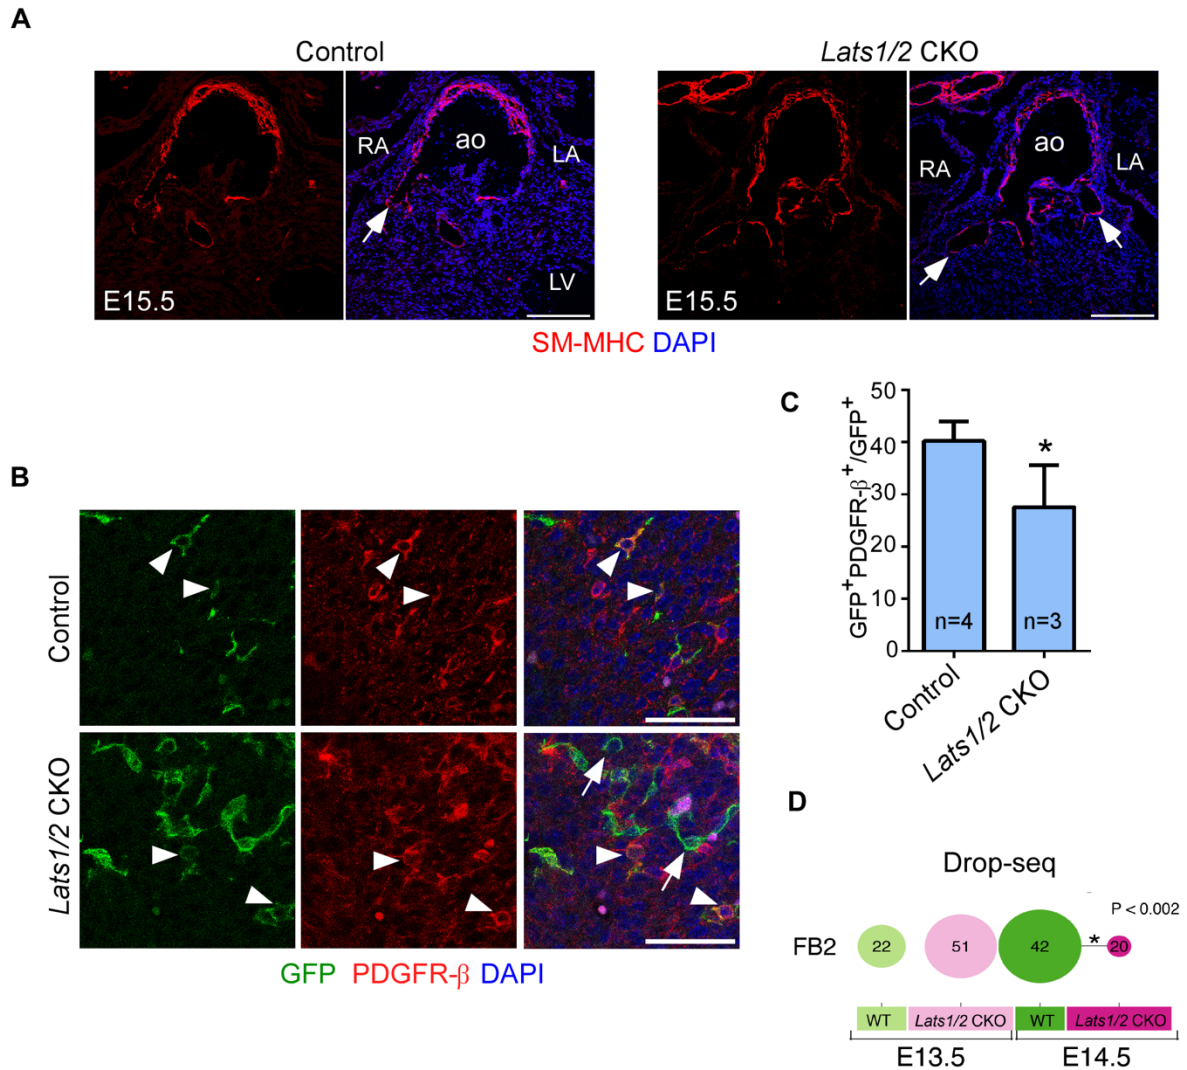

**Figure S6. Related to Figure 5. Reduction of epicardial derived coronary artery smooth muscle cells in *Lats1/2* CKO hearts. (A) Mature smooth muscle cells at E15.5 were labelled with SM-MHC. Connection were established between coronary**

artery and aorta both in control and *Lats1/2* CKO hearts (arrows). (B) Lineage tracing of epicardial derived coronary artery smooth muscle cell progenitors by co-labelling GFP and PDGFR- $\beta$  at R14.5. (C) The high magnification views of the yellow boxed area in B. Subepicardium was highlighted with PDGFR- $\beta$  (yellow arrowheads). *Lats1/2* CKO hearts exhibited accumulation of PDGFR- $\beta^+$  cells in subepicardium. (D) The high magnification views of the white boxed area in B. Reduced epicardial derived smooth muscle progenitor cells in *Lats1/2* CKO hearts. (E) Quantification of D. Scale bar, A-D 25  $\mu$ m. Data shown are means  $\pm$  SD. \* $P < 0.05$ , Mann-Whitney U test.

Figure S7

A

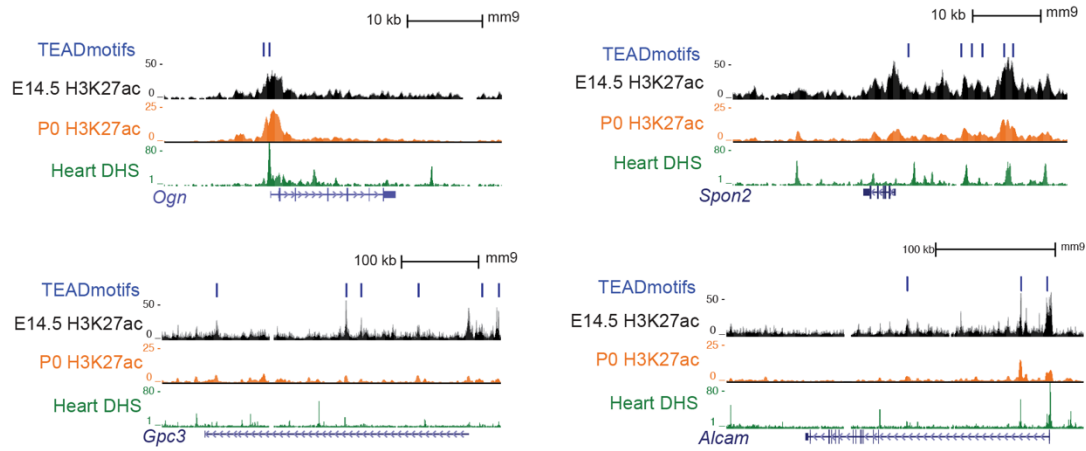

B

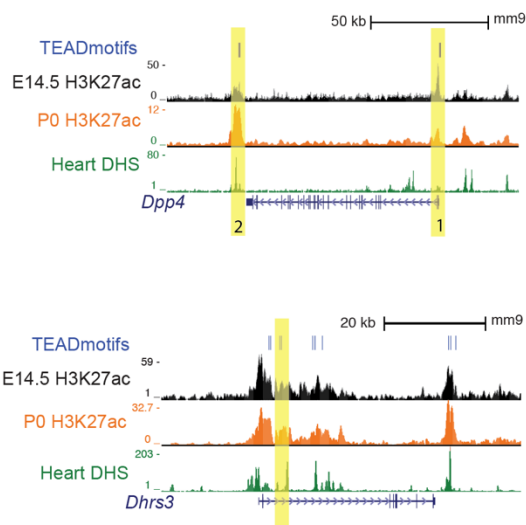

C

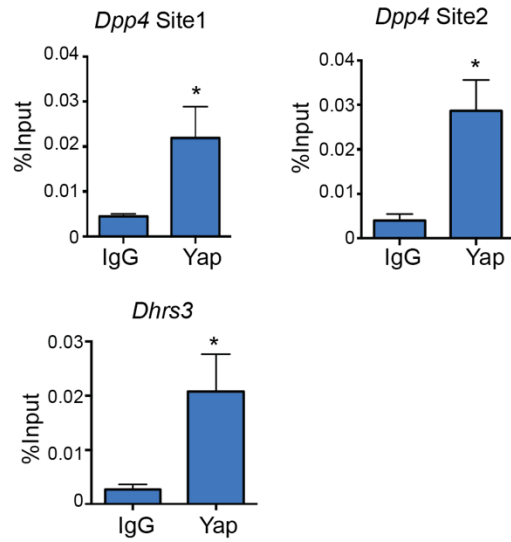

D

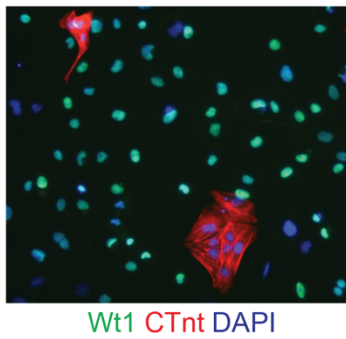

**Figure S7. Related to Figure 6. Direct Yap binding to the regulatory regions of the factors regulating extracellular milieu and cell differentiation in *Lats1/2* CKO hearts and cell identity of primary epicardial cell culture.**

(A) Numerous TEAD binding motifs were identified at the regulatory regions of genes encoding intercellular factors. (B-C) Yap-TEAD binding sites locates at the regulatory regions of *Dpp4* and *Dhrs3*. Yap ChIP-qPCR, quantified in the bar graphs, demonstrated Yap binding at the yellow highlighted region in the corresponding gene tracks. Data are means  $\pm$  SD. \* $P < 0.1$  was by Mann-Whitney U test. (D) Cell identity of primary epicardial cell culture at 24-hour after isolation. The culture mainly contains Wt1 positive epicardial cells with minimal CTnT<sup>+</sup> CMs.
